# Supplementary material
Source: publisher figshare collection journal article supplement (https://springernature.figshare.com/ndownloader/files/14536577)
Supplement: Supplementary file [file 14536577]

**Supp. Table 1: Cell lines used to generate brain organoids**

|   | Cell line name | Disease | Passage n. | Reference                           |
|---|----------------|---------|------------|-------------------------------------|
| 1 | GM23279A       | No      | 39-44      | NIGMS human genetic cell repository |
| 2 | ADHD4          | 1       | 16-18      | Sochacki et al. 2016                |
| 3 | ADHD24         | 1       | 16-18      | Sochacki et al. 2016                |
| 4 | DCC1ctl        | No      | 10-21      | unpublished                         |
| 5 | DCC4ctl        | No      | 17         | unpublished                         |
| 6 | DCC2           | 2       | 20-30      | unpublished                         |
| 7 | DCC5           | 2       | 5-13       | unpublished                         |

- 1- Attention Deficit Hyperactivity Disorder
- 2- Corpus callosum agenesis

**Supp. Table 2**

|                                | Velocity field<br>(max) [m/s] | Shear stress<br>(max) [Pa] | Reference                                  |
|--------------------------------|-------------------------------|----------------------------|--------------------------------------------|
| <b>Spin<math>\Omega</math></b> | 0.050                         | 0.560                      | -                                          |
| <b>Orbital<br/>Shaker</b>      | 0.120                         | 0.045                      | -                                          |
| <b>Spinner</b>                 | 0.178                         | 0.150                      | (Wang et al. <i>Stem Cell Res.</i> (2013)) |

## Supplementary Information - Methods

### Computational Fluid Dynamics Simulation

Computational Fluid Dynamics (CFD) simulations were performed for the flows either imposed by the impeller in the Spin  $\Omega$  or by the orbital shaker, by using the finite element commercial code COMSOL Multiphysics®. For the Spin $\Omega$  the rotating speed used was 60 rpm and for the orbital shaker, the rotating speed was 90 rpm, with a radius of 9.5 mm. Geometry and the finite element mesh used in the simulations involved 3 ml of the suspension culture media for both mixing techniques (Supp. Fig 4). The finite element meshes used for the bioreactor and stirrer plate flow simulations contained 390,000 and 125,000 elements, respectively. The numbers of finite elements and time steps used in the simulations were selected after grid refinement analyses; the differences between the velocity components computed with the meshes used in this work and with less refined meshes were smaller than 3%, at selected points in the fluid domains. The mesh used for the well on the stirrer plate was practically uniform, however, regions of large gradients may occur at different positions during the periodic movement that is externally imposed by the plate (see figure 2D). For the bioreactor, regions of largest gradients occur at the edge of the impeller and on the surface of the rotating shaft. In these areas, the mesh was refined (see figure 2B). The simulations were performed with the  $\kappa$ - $\omega$  turbulence model for the Spin $\Omega$ . A laminar two-phase model was used for the steering plates on the orbital shaker, which was validated with the experimental results of Salek et al. (Salek et al., 2012).
